# Supplementary material
Source: PubMed Central journal article supplement (PMC3870734)
Supplement: 1315879110_pnas.201315879SI.pdf [file 1315879110_pnas.201315879SI.pdf]

# Supporting Information

Zeldin et al. 10.1073/pnas.1315879110

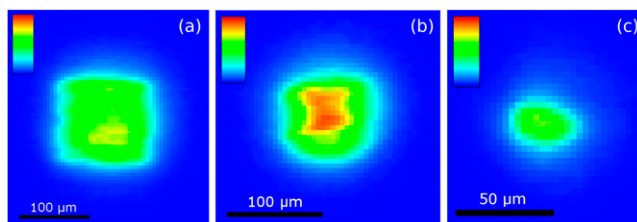

**Fig. S1.** False color images of the beam profiles used for the experiments presented here. Pixel size is  $5 \times 5 \mu\text{m}^2$  in all cases. Note the different sizes of scale bars for A–C. The color scale is from 0 to 255 (blue–red), and is the same for all of the images. Images were subsequently scaled to the full flux, as measured by the in-line calibrated diode. (A) Big beam,  $\sim 115 \times 115 \mu\text{m}^2$  FWHM, slits set to  $120 \times 120 \mu\text{m}^2$ , dark current value: 21. Dynamic range after dark current (DC) subtraction: 0–185. (B) Medium beam,  $\sim 60 \times 60 \mu\text{m}^2$  FWHM. DC value: 18. Dynamic range after DC subtraction: 0–237, but only 1 pixel saturated (value after DC subtraction: 237). (C) Small beam,  $\sim 25 \times 40 \mu\text{m}^2$  FWHM (vertical, horizontal). Dark current value: 21. Dynamic range after DC subtraction: 0–222.



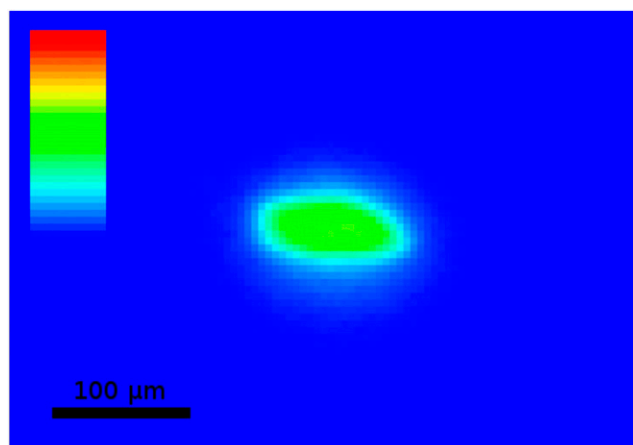

Fig. S3. Beam shape for the offset experiments, with the color bar representing 0–255 intensity units.

Table S1. Statistics for the big beam data collection

| Crystal | Probe | $I_n/I_1$ | Unique observations | $CC_{1/2}$     | Multiplicity | $I/\sigma(I)$ | $R_{meas}$      | Unit cell (Å) | Mosaicity (°) |
|---------|-------|-----------|---------------------|----------------|--------------|---------------|-----------------|---------------|---------------|
| P255    | 1     | 1.0       | 7,513               | 0.998 (0.985)  | 7.1 (7.3)    | 22.3 (10.7)   | 0.066 (0.176)   | 78.14         | 0.13          |
|         | 2     | 0.64      | 7,572               | 0.998 (0.952)  | 7.1 (7.3)    | 17.9 (6.0)    | 0.072 (0.322)   | 78.32         | 0.12          |
|         | 3     | 0.4       | 7,613               | 0.998 (0.386)  | 7.1 (7.2)    | 11.6 (1.2)    | 0.105 (1.832)   | 78.46         | 0.42          |
|         | 4*    | 0.088     | 7,515               | 0.558 (0.017)  | 7.1 (7.3)    | 1.2 (0.1)     | 1.005 (25.785)  | 78.14         | 0.05          |
|         | 5*    | 0.075     | 7,513               | 0.644 (0.036)  | 7.0 (7.1)    | 0.7 (-0.1)    | 1.254 (-9.990)  | 78.14         | 0.05          |
| P351    | 1     | 1.0       | 7,469               | 0.998 (0.971)  | 7.0 (7.2)    | 20.2 (7.5)    | 0.069 (0.250)   | 78.02         | 0.49          |
|         | 2     | 0.73      | 7,545               | 0.998 (0.882)  | 7.0 (7.2)    | 15.9 (3.4)    | 0.080 (0.554)   | 78.31         | 0.51          |
|         | 3     | 0.51      | 7,606               | 0.998 (0.237)  | 7.0 (7.2)    | 11.2 (1.0)    | 0.107 (2.020)   | 78.56         | 0.57          |
|         | 4     | 0.34      | 7,616               | 0.998 (0.071)  | 6.9 (7.1)    | 7.6 (0.3)     | 0.161 (6.710)   | 78.60         | 0.65          |
|         | 5     | 0.23      | 7,625               | 0.997 (0.078)  | 6.8 (7.0)    | 5.2 (0.2)     | 0.253 (9.169)   | 78.65         | 0.78          |
|         | 6     | 0.16      | 7,683               | 0.993 (0.011)  | 6.7 (6.8)    | 4.1 (0.1)     | 0.390 (28.006)  | 78.77         | 0.91          |
|         | 7     | 0.12      | 7,689               | 0.990 (0.098)  | 6.5 (6.1)    | 2.5 (-0.4)    | 0.626 (-3.458)  | 78.89         | 0.98          |
|         | 8     | 0.034     | 7,791               | 0.971 (-0.013) | 6.5 (6.5)    | 1.5 (0.1)     | 1.072 (58.404)  | 79.21         | 1.05          |
| P359    | 1     | 1.0       | 7,492               | 0.999 (0.971)  | 7.1 (7.2)    | 21.1 (7.9)    | 0.061 (0.251)   | 78.04         | 0.26          |
|         | 2     | 0.74      | 7,547               | 0.999 (0.853)  | 7.1 (7.3)    | 16.6 (3.3)    | 0.073 (0.633)   | 78.24         | 0.34          |
|         | 3     | 0.54      | 7,569               | 0.999 (0.211)  | 7.0 (7.2)    | 11.1 (0.9)    | 0.114 (2.499)   | 78.32         | 0.49          |
|         | 4     | 0.37      | 7,586               | 0.998 (0.029)  | 7.0 (7.1)    | 8.0 (0.3)     | 0.181 (7.011)   | 78.34         | 0.62          |
|         | 5     | 0.21      | 7,596               | 0.996 (-0.037) | 6.9 (6.9)    | 4.1 (0.1)     | 0.311 (20.043)  | 78.39         | 0.72          |
|         | 6     | 0.14      | 7,611               | 0.988 (0.023)  | 6.1 (5.9)    | 2.4 (0.0)     | 0.438 (-9.990)  | 78.46         | 0.73          |
|         | 7*    | 0.092     | 7,576               | 0.932 (0.015)  | 6.7 (7.3)    | 1.4 (0.0)     | 1.228 (34.847)  | 78.38         | 0.05          |
|         | 8*    | 0.096     | 7,570               | 0.972 (-0.001) | 6.9 (7.1)    | 1.6 (0.1)     | 1.362 (26.384)  | 78.30         | 0.20          |
|         | 9*    | 0.034     | 7,580               | 0.827 (0.063)  | 6.6 (5.5)    | 0.9 (-0.4)    | 3.866 (-1.311)  | 78.38         | 0.05          |
|         | 10*   | 0.016     | 7,582               | 0.826 (0.032)  | 7.0 (7.1)    | 0.9 (0.0)     | 2.382 (-9.990)  | 78.38         | 0.05          |
| P3510   | 1     | 1.0       | 7,516               | 0.998 (0.875)  | 7.1 (7.2)    | 15.3 (3.5)    | 0.093 (0.560)   | 78.18         | 0.53          |
|         | 2     | 0.68      | 7,582               | 0.997 (0.447)  | 7.0 (7.2)    | 11.0 (1.2)    | 0.129 (1.671)   | 78.45         | 0.66          |
|         | 3     | 0.47      | 7,602               | 0.996 (0.061)  | 6.9 (7.0)    | 6.8 (0.3)     | 0.230 (7.417)   | 78.53         | 0.99          |
|         | 4     | 0.32      | 7,599               | 0.990 (0.052)  | 6.6 (6.5)    | 4.4 (-0.1)    | 0.441 (-9.467)  | 78.54         | 1.19          |
|         | 5     | 0.23      | 7,505               | 0.988 (-0.046) | 5.7 (3.5)    | 2.6 (-1.4)    | 0.596 (-0.657)  | 78.32         | 1.34          |
|         | 6*    | 0.076     | 7,582               | 0.903 (0.080)  | 6.5 (5.0)    | 0.7 (-1.0)    | 2.004 (-1.050)  | 78.48         | 0.05          |
|         | 7*    | 0.015     | 7,577               | 0.878 (-0.021) | 7.0 (7.2)    | 0.6 (0.0)     | 2.865 (-9.990)  | 78.48         | 0.05          |
|         | 8*    | 0.0036    | 7,576               | 0.706 (-0.029) | 6.9 (6.7)    | 0.3 (-0.1)    | 11.254 (-3.461) | 78.48         | 0.05          |

These crystals were highly damaged as the experiment progressed, and so later datasets exhibit unphysical statistics. The use of the  $I_n/I_1 > 0.4$  cutoff for later data analysis ensured that data from crystals that were too damaged to be meaningful were not included. Once the data are sufficiently degraded ( $I/\sigma(I) < 1.5$ ,  $I_n/I_1 < 0.1$ ), the mosaicity for the crystal cannot be determined in *MOSFLM*, so the value is reset to its default, indicated by an asterisk in the table. All datasets had completeness  $>99.2\%$  ( $98.2\%$  in the highest resolution shell). Average values are shown, with the outer resolution shell (1.8–1.9 Å) in brackets.

**Table S2. Statistics for the medium beam data collection**

| Crystal | Probe | $I_n/I_1$ | Unique observations | $CC_{1/2}$     | Multiplicity | $I/\sigma(I)$ | $R_{meas}$     | Unit cell (Å) | Mosaicity (°) |
|---------|-------|-----------|---------------------|----------------|--------------|---------------|----------------|---------------|---------------|
| 191     | 1     | 1.0       | 7,505               | 0.974 (0.976)  | 6.9 (7.2)    | 12.1 (9.7)    | 0.158 (0.174)  | 78.26         | 0.43          |
|         | 2     | 0.86      | 7,550               | 0.980 (0.974)  | 6.9 (7.2)    | 11.9 (8.7)    | 0.157 (0.179)  | 78.40         | 0.43          |
|         | 3     | 0.88      | 7,572               | 0.980 (0.975)  | 6.9 (7.1)    | 12.4 (8.1)    | 0.145 (0.181)  | 78.42         | 0.41          |
|         | 4     | 0.85      | 7,597               | 0.982 (0.970)  | 6.9 (7.1)    | 11.9 (7.2)    | 0.148 (0.209)  | 78.51         | 0.46          |
|         | 5     | 0.53      | 7,597               | 0.984 (0.963)  | 6.9 (7.1)    | 11.3 (7.1)    | 0.147 (0.232)  | 78.55         | 0.43          |
|         | 6     | 0.61      | 7,598               | 0.985 (0.949)  | 6.9 (7.1)    | 10.8 (5.6)    | 0.143 (0.283)  | 78.54         | 0.46          |
|         | 7     | 0.51      | 7,599               | 0.987 (0.941)  | 6.9 (7.1)    | 11.0 (5.9)    | 0.141 (0.332)  | 78.58         | 0.48          |
|         | 8     | 0.4       | 7,609               | 0.986 (0.908)  | 6.9 (7.1)    | 9.9 (5.0)     | 0.155 (0.426)  | 78.59         | 0.47          |
|         | 9     | 0.33      | 7,615               | 0.987 (0.870)  | 6.9 (7.1)    | 9.1 (4.1)     | 0.165 (0.548)  | 78.60         | 0.51          |
|         | 10    | 0.3       | 7,621               | 0.985 (0.809)  | 6.9 (7.1)    | 8.8 (3.7)     | 0.164 (0.701)  | 78.62         | 0.54          |
|         | 11    | 0.26      | 7,632               | 0.984 (0.761)  | 6.9 (7.1)    | 8.5 (3.2)     | 0.168 (0.828)  | 78.65         | 0.49          |
| 225     | 1     | 1.0       | 7,465               | 0.998 (0.994)  | 6.8 (7.1)    | 25.6 (16.7)   | 0.060 (0.097)  | 78.03         | 0.34          |
|         | 2     | 0.83      | 7,482               | 0.996 (0.991)  | 6.8 (7.1)    | 21.2 (13.1)   | 0.075 (0.118)  | 78.11         | 0.35          |
|         | 3     | 0.98      | 7,508               | 0.998 (0.989)  | 6.8 (7.1)    | 23.4 (13.6)   | 0.063 (0.129)  | 78.25         | 0.38          |
|         | 4     | 0.82      | 7,551               | 0.998 (0.984)  | 6.8 (7.1)    | 21.6 (11.0)   | 0.067 (0.163)  | 78.36         | 0.43          |
|         | 5     | 0.7       | 7,578               | 0.997 (0.972)  | 6.8 (7.1)    | 19.3 (8.6)    | 0.072 (0.209)  | 78.44         | 0.45          |
|         | 6     | 0.61      | 7,587               | 0.997 (0.959)  | 6.8 (7.1)    | 17.9 (7.1)    | 0.077 (0.273)  | 78.47         | 0.49          |
|         | 7     | 0.53      | 7,607               | 0.997 (0.930)  | 6.8 (7.1)    | 16.4 (5.9)    | 0.085 (0.351)  | 78.54         | 0.51          |
|         | 8     | 0.42      | 7,612               | 0.996 (0.886)  | 6.8 (7.1)    | 14.7 (4.8)    | 0.092 (0.461)  | 78.58         | 0.54          |
|         | 9     | 0.38      | 7,627               | 0.996 (0.836)  | 6.8 (7.1)    | 13.1 (3.7)    | 0.101 (0.605)  | 78.62         | 0.55          |
|         | 10    | 0.33      | 7,625               | 0.996 (0.756)  | 6.8 (7.1)    | 12.2 (3.1)    | 0.110 (0.772)  | 78.61         | 0.57          |
|         | 11    | 0.31      | 7,666               | 0.996 (0.621)  | 6.8 (7.1)    | 11.2 (2.4)    | 0.120 (1.043)  | 78.67         | 0.58          |
| 2004    | 1     | 1.0       | 7,483               | 0.998 (0.994)  | 7.0 (7.2)    | 29.7 (16.1)   | 0.053 (0.110)  | 78.05         | 0.41          |
|         | 2     | 0.76      | 7,532               | 0.998 (0.988)  | 7.0 (7.2)    | 27.1 (12.6)   | 0.057 (0.151)  | 78.25         | 0.34          |
|         | 3     | 0.61      | 7,596               | 0.998 (0.963)  | 7.0 (7.2)    | 23.1 (7.1)    | 0.063 (0.285)  | 78.45         | 0.34          |
|         | 4     | 0.49      | 7,632               | 0.998 (0.856)  | 7.0 (7.2)    | 18.2 (3.2)    | 0.074 (0.624)  | 78.61         | 0.40          |
|         | 5     | 0.37      | 7,700               | 0.998 (0.491)  | 7.0 (7.2)    | 13.8 (1.5)    | 0.087 (1.354)  | 78.76         | 0.51          |
|         | 6     | 0.31      | 7,702               | 0.998 (0.134)  | 6.9 (7.1)    | 10.9 (0.7)    | 0.104 (3.022)  | 78.80         | 0.61          |
|         | 7     | 0.24      | 7,709               | 0.998 (0.014)  | 6.9 (7.1)    | 8.6 (0.3)     | 0.129 (5.384)  | 78.86         | 0.72          |
|         | 8     | 0.19      | 7,712               | 0.998 (-0.029) | 6.8 (7.0)    | 6.9 (0.2)     | 0.164 (11.106) | 78.90         | 0.83          |
|         | 9     | 0.16      | 7,739               | 0.998 (0.024)  | 6.8 (7.0)    | 5.6 (0.1)     | 0.211 (20.484) | 78.98         | 0.89          |
|         | 10*   | 0.039     | 7,527               | 0.749 (-0.015) | 7.0 (7.2)    | 1.0 (0.1)     | 1.033 (49.363) | 78.24         | 0.05          |
| 2012    | 1     | 1.0       | 7,522               | 0.996 (0.996)  | 6.9 (7.2)    | 30.8 (25.0)   | 0.065 (0.078)  | 78.20         | 0.07          |
|         | 2     | 0.8       | 7,545               | 0.996 (0.994)  | 7.0 (7.3)    | 29.7 (19.7)   | 0.063 (0.095)  | 78.29         | 0.14          |
|         | 3     | 0.64      | 7,569               | 0.997 (0.985)  | 7.0 (7.2)    | 25.1 (11.7)   | 0.064 (0.149)  | 78.35         | 0.25          |
|         | 4     | 0.5       | 7,584               | 0.997 (0.969)  | 7.0 (7.2)    | 20.9 (8.6)    | 0.069 (0.236)  | 78.41         | 0.34          |
|         | 5     | 0.38      | 7,601               | 0.998 (0.932)  | 7.0 (7.2)    | 16.4 (5.3)    | 0.078 (0.374)  | 78.44         | 0.42          |
|         | 6     | 0.32      | 7,606               | 0.997 (0.860)  | 7.0 (7.2)    | 13.1 (3.2)    | 0.089 (0.569)  | 78.46         | 0.47          |
|         | 7     | 0.27      | 7,607               | 0.996 (0.736)  | 7.0 (7.2)    | 10.4 (2.3)    | 0.108 (0.846)  | 78.48         | 0.51          |
|         | 8     | 0.25      | 7,611               | 0.995 (0.614)  | 7.0 (7.1)    | 8.3 (1.7)     | 0.130 (1.185)  | 78.48         | 0.51          |
|         | 9     | 0.2       | 7,591               | 0.993 (0.491)  | 7.0 (7.2)    | 6.9 (1.4)     | 0.156 (1.446)  | 78.40         | 0.46          |
|         | 10*   | 0.15      | 7,577               | 0.969 (0.496)  | 7.1 (7.3)    | 4.9 (1.2)     | 0.248 (1.483)  | 78.37         | 0.03          |
|         | 11*   | 0.16      | 7,567               | 0.984 (0.306)  | 7.0 (7.2)    | 5.3 (1.0)     | 0.212 (2.083)  | 78.32         | 0.34          |
| 2019    | 1     | 1.0       | 7,429               | 0.993 (0.996)  | 6.9 (7.2)    | 28.4 (23.6)   | 0.071 (0.079)  | 77.95         | 0.07          |
|         | 2     | 0.88      | 7,483               | 0.996 (0.995)  | 7.0 (7.2)    | 30.3 (19.6)   | 0.063 (0.097)  | 78.10         | 0.13          |
|         | 3     | 0.74      | 7,522               | 0.998 (0.990)  | 7.0 (7.2)    | 26.7 (13.7)   | 0.062 (0.137)  | 78.23         | 0.18          |
|         | 4     | 0.64      | 7,547               | 0.998 (0.982)  | 7.0 (7.2)    | 23.3 (9.5)    | 0.067 (0.199)  | 78.33         | 0.20          |
|         | 5*    | 0.51      | 7,568               | 0.992 (0.957)  | 7.0 (7.2)    | 10.9 (5.3)    | 0.117 (0.300)  | 78.42         | 0.02          |
|         | 6*    | 0.43      | 7,553               | 0.984 (0.915)  | 6.9 (7.2)    | 8.2 (3.8)     | 0.153 (0.434)  | 78.44         | -0.01         |
|         | 7*    | 0.38      | 7,556               | 0.978 (0.847)  | 6.9 (7.2)    | 6.8 (2.7)     | 0.183 (0.604)  | 78.43         | -0.01         |
|         | 8*    | 0.32      | 7,529               | 0.969 (0.748)  | 6.9 (7.2)    | 5.9 (2.0)     | 0.203 (0.842)  | 78.35         | 0.00          |
| 2024    | 1     | 1.0       | 7,419               | 0.996 (0.996)  | 6.6 (7.1)    | 29.8 (22.4)   | 0.060 (0.078)  | 78.04         | 0.23          |
|         | 2     | 0.81      | 7,486               | 0.996 (0.993)  | 6.6 (7.2)    | 26.8 (17.0)   | 0.064 (0.104)  | 78.18         | 0.25          |
|         | 3     | 0.73      | 7,518               | 0.996 (0.989)  | 6.8 (7.2)    | 23.5 (12.6)   | 0.068 (0.138)  | 78.26         | 0.29          |
|         | 4     | 0.65      | 7,547               | 0.997 (0.982)  | 6.8 (7.2)    | 20.8 (10.0)   | 0.071 (0.184)  | 78.35         | 0.31          |
|         | 5     | 0.53      | 7,559               | 0.997 (0.967)  | 6.9 (7.2)    | 18.5 (6.7)    | 0.077 (0.259)  | 78.41         | 0.32          |
|         | 6     | 0.48      | 7,581               | 0.996 (0.933)  | 6.8 (7.2)    | 15.7 (5.6)    | 0.087 (0.368)  | 78.50         | 0.32          |
|         | 7     | 0.38      | 7,578               | 0.995 (0.890)  | 6.9 (7.2)    | 12.4 (4.6)    | 0.106 (0.479)  | 78.49         | 0.20          |
|         | 8     | 0.34      | 7,611               | 0.995 (0.801)  | 6.9 (7.2)    | 11.6 (3.4)    | 0.112 (0.709)  | 78.62         | 0.28          |
|         | 9*    | 0.29      | 7,617               | 0.985 (0.687)  | 6.9 (7.2)    | 6.8 (2.5)     | 0.180 (0.953)  | 78.65         | 0.09          |
|         | 10*   | 0.23      | 7,642               | 0.979 (0.562)  | 6.9 (7.2)    | 5.9 (2.0)     | 0.199 (1.253)  | 78.68         | 0.08          |
|         | 11*   | 0.21      | 7,659               | 0.992 (0.419)  | 6.9 (7.1)    | 7.7 (1.8)     | 0.154 (1.601)  | 78.68         | 0.32          |

An asterisk indicates unreliable data, a consequence of the high levels of damage. All datasets had >99.3% completeness. Average values are shown, with the outer resolution shell (1.8–1.9 Å) in brackets.

**Table S3. Statistics for the small beam data collection**

| Crystal | Probe | $I_n/I_1$ | Unique observations | $CC_{1/2}$    | Multiplicity | $I/\sigma(I)$ | $R_{meas}$    | Unit cell (Å) | Mosaicity (°) |
|---------|-------|-----------|---------------------|---------------|--------------|---------------|---------------|---------------|---------------|
| 55      | 1     | 1.0       | 7,498               | 0.997 (0.986) | 7.1 (7.3)    | 20.0 (10.9)   | 0.078 (0.171) | 78.07         | 0.03          |
|         | 2     | 0.9       | 7,508               | 0.997 (0.984) | 7.1 (7.3)    | 19.4 (9.6)    | 0.074 (0.195) | 78.13         | 0.06          |
|         | 3     | 0.89      | 7,540               | 0.997 (0.971) | 7.1 (7.3)    | 18.5 (7.6)    | 0.075 (0.251) | 78.19         | 0.09          |
|         | 4     | 0.85      | 7,560               | 0.997 (0.948) | 7.1 (7.3)    | 16.8 (5.5)    | 0.081 (0.350) | 78.25         | 0.12          |
|         | 5     | 0.7       | 7,566               | 0.997 (0.921) | 7.1 (7.3)    | 15.6 (4.5)    | 0.087 (0.458) | 78.33         | 0.13          |
|         | 6     | 0.69      | 7,577               | 0.997 (0.872) | 7.1 (7.3)    | 14.5 (3.6)    | 0.094 (0.588) | 78.35         | 0.14          |
|         | 7     | 0.68      | 7,576               | 0.997 (0.824) | 7.1 (7.3)    | 13.3 (2.9)    | 0.101 (0.732) | 78.36         | 0.16          |
|         | 8     | 0.66      | 7,604               | 0.997 (0.723) | 7.1 (7.3)    | 12.1 (2.3)    | 0.111 (0.958) | 78.45         | 0.17          |
|         | 9     | 0.58      | 7,609               | 0.996 (0.615) | 7.1 (7.3)    | 11.3 (1.9)    | 0.121 (1.180) | 78.49         | 0.18          |
|         | 10    | 0.54      | 7,571               | 0.997 (0.629) | 7.0 (7.3)    | 11.4 (1.9)    | 0.119 (1.150) | 78.37         | 0.19          |
|         | 11    | 0.49      | 7,600               | 0.997 (0.488) | 7.0 (7.3)    | 10.5 (1.4)    | 0.131 (1.573) | 78.46         | 0.22          |
| 197     | 1     | 1.0       | 7,558               | 0.993 (0.984) | 7.1 (7.3)    | 17.0 (10.2)   | 0.099 (0.164) | 78.28         | 0.06          |
|         | 2     | 0.87      | 7,565               | 0.993 (0.987) | 7.1 (7.3)    | 17.2 (10.6)   | 0.096 (0.173) | 78.32         | 0.06          |
|         | 3     | 0.8       | 7,580               | 0.995 (0.979) | 7.1 (7.3)    | 16.8 (9.1)    | 0.093 (0.200) | 78.35         | 0.07          |
|         | 4     | 0.82      | 7,641               | 0.990 (0.959) | 7.1 (7.4)    | 10.7 (5.9)    | 0.124 (0.290) | 78.60         | 0.02          |
|         | 5     | 0.79      | 7,591               | 0.996 (0.961) | 7.1 (7.3)    | 15.8 (6.8)    | 0.093 (0.283) | 78.38         | 0.09          |
|         | 6     | 0.56      | 7,590               | 0.996 (0.953) | 7.1 (7.4)    | 15.5 (6.0)    | 0.096 (0.332) | 78.39         | 0.10          |
|         | 7     | 0.67      | 7,590               | 0.996 (0.952) | 7.1 (7.3)    | 16.1 (6.0)    | 0.092 (0.330) | 78.41         | 0.11          |
|         | 8     | 0.57      | 7,606               | 0.996 (0.926) | 7.1 (7.3)    | 14.7 (5.0)    | 0.097 (0.417) | 78.43         | 0.11          |
|         | 9     | 0.5       | 7,606               | 0.997 (0.892) | 7.1 (7.3)    | 14.2 (4.2)    | 0.100 (0.510) | 78.45         | 0.12          |
|         | 10*   | 0.49      | 7,640               | 0.995 (0.857) | 7.1 (7.4)    | 12.4 (3.6)    | 0.113 (0.593) | 78.60         | 0.06          |
|         | 11*   | 0.45      | 7,640               | 0.996 (0.831) | 7.1 (7.4)    | 12.2 (3.4)    | 0.113 (0.655) | 78.60         | 0.07          |
| 5185    | 1     | 1.0       | 7,428               | 0.996 (0.988) | 7.1 (7.3)    | 19.3 (12.4)   | 0.082 (0.151) | 77.92         | 0.03          |
|         | 2     | 0.82      | 7,428               | 0.996 (0.982) | 7.1 (7.3)    | 19.5 (11.6)   | 0.082 (0.173) | 77.92         | 0.03          |
|         | 3     | 0.83      | 7,430               | 0.996 (0.983) | 7.1 (7.3)    | 18.0 (10.0)   | 0.084 (0.186) | 77.92         | 0.03          |
|         | 4     | 0.83      | 7,429               | 0.995 (0.976) | 7.1 (7.3)    | 16.2 (8.7)    | 0.087 (0.209) | 77.92         | 0.02          |
|         | 5     | 0.78      | 7,429               | 0.994 (0.974) | 7.1 (7.3)    | 15.0 (7.7)    | 0.094 (0.238) | 77.92         | 0.02          |
|         | 6     | 0.71      | 7,430               | 0.992 (0.963) | 7.1 (7.3)    | 13.0 (6.7)    | 0.102 (0.275) | 77.92         | 0.02          |
|         | 7     | 0.69      | 7,498               | 0.997 (0.960) | 7.1 (7.3)    | 17.2 (6.8)    | 0.082 (0.306) | 78.15         | 0.11          |
|         | 8     | 0.61      | 7,530               | 0.997 (0.947) | 7.1 (7.3)    | 16.2 (5.7)    | 0.086 (0.363) | 78.18         | 0.12          |
| P1S10   | 1     | 1.0       | 7,445               | 0.998 (0.986) | 7.1 (7.2)    | 22.4 (11.4)   | 0.065 (0.164) | 77.94         | 0.14          |
|         | 2     | 0.96      | 7,465               | 0.998 (0.983) | 7.1 (7.2)    | 22.3 (9.8)    | 0.062 (0.193) | 78.03         | 0.14          |
|         | 3     | 0.89      | 7,485               | 0.998 (0.974) | 7.1 (7.2)    | 20.5 (8.2)    | 0.064 (0.231) | 78.10         | 0.16          |
|         | 4     | 0.89      | 7,485               | 0.998 (0.965) | 7.1 (7.2)    | 18.7 (6.6)    | 0.069 (0.283) | 78.16         | 0.21          |
|         | 5     | 0.83      | 7,517               | 0.998 (0.950) | 7.1 (7.2)    | 17.1 (5.6)    | 0.076 (0.344) | 78.20         | 0.25          |
|         | 6     | 0.77      | 7,520               | 0.998 (0.932) | 7.1 (7.2)    | 15.6 (4.9)    | 0.082 (0.398) | 78.24         | 0.26          |
|         | 7     | 0.67      | 7,536               | 0.997 (0.905) | 7.1 (7.2)    | 14.5 (4.2)    | 0.089 (0.475) | 78.27         | 0.28          |
|         | 8     | 0.56      | 7,542               | 0.997 (0.882) | 7.1 (7.2)    | 13.9 (3.6)    | 0.094 (0.568) | 78.30         | 0.29          |
| P3S2    | 9     | 0.55      | 7,557               | 0.997 (0.845) | 7.1 (7.2)    | 13.1 (3.2)    | 0.098 (0.642) | 78.34         | 0.30          |
|         | 1     | 1.0       | 7,489               | 0.998 (0.987) | 7.0 (7.1)    | 23.1 (12.2)   | 0.062 (0.152) | 78.03         | 0.60          |
|         | 2     | 0.93      | 7,500               | 0.998 (0.986) | 7.0 (7.1)    | 22.7 (11.1)   | 0.063 (0.168) | 78.08         | 0.61          |
|         | 3     | 0.89      | 7,510               | 0.998 (0.980) | 7.0 (7.1)    | 21.7 (9.9)    | 0.063 (0.193) | 78.10         | 0.61          |
|         | 4     | 0.82      | 7,510               | 0.998 (0.975) | 7.0 (7.1)    | 21.2 (8.8)    | 0.064 (0.213) | 78.15         | 0.62          |
|         | 5     | 0.79      | 7,510               | 0.998 (0.973) | 7.0 (7.1)    | 20.4 (8.1)    | 0.066 (0.234) | 78.16         | 0.63          |
|         | 6     | 0.73      | 7,542               | 0.998 (0.965) | 7.0 (7.1)    | 19.8 (7.4)    | 0.068 (0.259) | 78.18         | 0.63          |
|         | 7     | 0.73      | 7,542               | 0.998 (0.964) | 7.0 (7.1)    | 19.3 (6.7)    | 0.068 (0.277) | 78.20         | 0.65          |
|         | 8     | 0.67      | 7,545               | 0.998 (0.954) | 7.0 (7.1)    | 18.3 (6.3)    | 0.072 (0.310) | 78.25         | 0.65          |
|         | 9     | 0.64      | 7,561               | 0.998 (0.948) | 7.0 (7.1)    | 17.8 (5.7)    | 0.074 (0.341) | 78.26         | 0.66          |

An asterisk indicates that there were very few reflection available for postrefinement, leading to problems in obtaining the correct mosaicity. All datasets had >99.6% completeness. Average values are shown, with the outer resolution shell (1.8–1.9 Å) in brackets.
